1 **Mitral Annular Disjunction in Out-of-Hospital Cardiac Arrest Patients – a**  
2 **Retrospective Cardiac MRI Study**

3 Felix Troger<sup>a</sup>, Gert Klug<sup>b</sup>, Paulina Poskaite<sup>a</sup>, Christina Tiller<sup>b</sup>, Ivan Lechner<sup>b</sup>, Martin  
4 Reindl<sup>b</sup>, Magdalena Holzknacht<sup>b</sup>, Priscilla Fink<sup>b</sup>, Eva-Maria Brunbauer<sup>a</sup>,  
5 Elke R. Gizewski<sup>a</sup>, Bernhard Metzler<sup>b</sup>, Sebastian Reinstadler<sup>b</sup>, Agnes Mayr<sup>a,\*</sup>.

6

7 <sup>a</sup>University Clinic of Radiology, Medical University of Innsbruck, Anichstrasse 35,  
8 6020 Innsbruck, Austria

9 <sup>b</sup>University Clinic of Internal Medicine III, Cardiology and Angiology,  
10 Medical University of Innsbruck, Anichstrasse 35, 6020 Innsbruck, Austria

11

12

13 **Abstract Word Count: 248** words

14 **Word Count (Introduction-Discussion): 3,772** words

15

16

17

18

19

20 **\*Address for Correspondence:**

21 **Agnes Mayr, MD**

22 University Clinic of Radiology

23 Medical University of Innsbruck

24 Anichstrasse 35, A-6020 Innsbruck, Austria

25 Phone: +43 50 504 22761

26 Fax: +43 50 504 22758

27 Email: a.mayr@i-med.ac.at

28

29

1 **Abstract**

2 **Background:** Mitral annular disjunction (MAD), defined as defective attachment of the  
3 mitral annulus to the ventricular myocardium, has recently been linked to malignant  
4 arrhythmias. However, its role and prognostic significance in patients requiring cardio-  
5 pulmonary resuscitation (CPR) remains unknown. This retrospective analysis aimed to  
6 describe prevalence and significance of MAD by cardiac magnetic resonance (CMR)  
7 imaging, in out-of-hospital cardiac arrest (OHCA) patients.

8 **Methods:** Eighty-six patients with OHCA and a CMR scan 5 days after CPR (interquartile  
9 range (IQR): 49 days before – 9 days after) were consecutively enrolled. MAD was defined as  
10 disjunction-extent  $\geq 1$ mm in CMR long-axis cine-images. Medical records were screened for  
11 laboratory parameters, comorbidities and prior arrhythmias.

12 **Results:** In 34 patients (40%), no underlying cause for OHCA was found during  
13 hospitalization despite profound diagnostics. Unknown-cause OHCA patients showed a  
14 higher prevalence of MAD compared to definite-cause patients (56% vs. 10%,  $p < 0.001$ ) and  
15 had a MAD-extent of 6.3mm (IQR: 4.4-10.3); moreover, these patients were significantly  
16 younger (43 years vs. 61 years,  $p < 0.001$ ), more often female (74% vs. 21%,  $p < 0.001$ ) and had  
17 fewer comorbidities (hypertension, hypercholesterolemia, coronary artery disease, all  
18  $p < 0.005$ ). By logistic regression analysis, presence of MAD remained significantly associated  
19 with OHCA of unknown cause (odds ratio: 8.49, 95% confidence interval: 2.37-30.41,  
20  $p = 0.001$ ) after adjustment for age, presence of hypertension and hypercholesterolemia.

21 **Conclusions:** MAD is rather common in OHCA patients without definitive aetiology  
22 undergoing CMR. Presence of MAD remains independently associated to OHCA without  
23 identifiable trigger. Further research is needed to understand the exact role of MAD in OHCA  
24 patients.

1 **Clinical Perspectives**

- 2       • This study showed that MAD is apparently a common finding in cardiac arrest  
3 patients without underlying trigger and was associated with it independently of age,  
4 concomitant hypertension and hypercholesterolemia.
- 5       • In clinical routine, MAD should be considered as potential arrhythmogenic substrate  
6 especially in those cardiac arrest patients, in which eventually no clear etiology can be  
7 found.
- 8       • However, future studies need to further explore the role of MAD in these patients and  
9 investigate the true arrhythmogenic potential of this anatomical variant.

10

11 *(79 words)*

12

13

14 **Keywords:** Mitral Valve, Mitral Annular Disjunction, Out-of-Hospital Cardiac Arrest,

15 Cardiac Magnetic Resonance Imaging

16

17

1 **List of Abbreviations**

- 2 BMI, Body Mass Index
- 3 BSA, Body Surface Area
- 4 CA, Cardiac Arrest
- 5 CAD, Coronary Artery Disease
- 6 CI, Confidence Interval
- 7 CMR, Cardiovascular Magnetic Resonance Imaging
- 8 CPR, Cardio-Pulmonary Resuscitation
- 9 CT, Computed Tomography
- 10 CTA, Computed Tomography Angiography
- 11 CX; Circumflex Artery
- 12 ECG, Electrocardiogram
- 13 EDV, Enddiastolic Volume
- 14 EDVi, Enddiastolic Volume Indexed by Body Surface Area
- 15 ESV, Endsystolic Volume
- 16 ESVi, Endsystolic Volume Indexed by Body Surface Area
- 17 IQR, Interquartile Range
- 18 LAD, Left Anterior Descending Artery
- 19 LGE, Late Gadolinium Enhancement
- 20 LV, Left Ventricle/Ventricular
- 21 MAD, Mitral Annular Disjunction
- 22 MM, Myocardial Mass
- 23 MVP, Mitral Valve Prolapse
- 24 OHCA, Out-of-Hospital Cardiac Arrest
- 25 OR, Odds Ratio
- 26 RCA, Right Coronary Artery
- 27 VF, Ventricular Fibrillation

## 1 **Introduction**

2 Mitral annular disjunction (MAD) represents the defective anchoring of the mitral valve  
3 annulus into the ventricular myocardium (1). This anatomical variant has long been regarded  
4 as rather common, but clinically irrelevant secondary finding to mitral valve prolapse (MVP)  
5 (2). However, its status as a distinct disease entity acting as a possible substrate for ventricular  
6 arrhythmias has been increasingly substantiated within the past few years (3, 4). Recent  
7 studies suggested that its formerly assumed prevalence has been clearly underestimated (5);  
8 additionally, the term MAD was uncoupled from its status as a negligible auxiliary finding of  
9 MVP, as it was shown that MAD could be detected even without concomitant prolapse (3).  
10 To date, the research interest in MAD is continuously growing (2). However, data about its  
11 clinical relevance and postulated association to ventricular arrhythmias are scarce (6-8).  
12 Furthermore, data about its prevalence and significance in out-of-hospital cardiac arrest  
13 (OHCA) patients are completely lacking. Nevertheless, OHCA represents a leading cause of  
14 mortality worldwide (9), with an estimated 20% being of unknown or unobtainable cause  
15 (10). Although most studies tend to use echocardiography to screen and evaluate MAD,  
16 assessment by cardiac magnetic resonance (CMR) imaging seems more appropriate,  
17 especially in MAD of minor extent (11).  
18 Accordingly, the aims of this retrospective study were as follows: a) to determine the  
19 prevalence of MAD in a population of OHCA patients; b) to assess its prevalence in OHCA  
20 patients in whom no definite cause of cardiac arrest (CA) was finally definable; and, c) to  
21 classify the role of MAD in this latter patient group.

22

23

## 1 **Methods**

### 2 **Study population**

3 The study population included all OHCA patients treated at the local university hospital from  
4 June 2007 to April 2021, where an adequate CMR scan was available. Patient records were  
5 screened for comorbidities and risk factors, positive family history for coronary artery disease  
6 (CAD) or CA and laboratory parameters as well as further diagnostic measures, including  
7 electrocardiography (ECG) and cardiac computed tomography (CT). Moreover, these records  
8 were checked for additional rhythmological events before, during or after hospital stay. CAD  
9 was defined as any coronary atherosclerotic disease detected in the respective modality (i.e.  
10 CT or cardiac catheterization). A flowchart of in- and excluded patients is shown in figure 2.  
11 This study was approved by the local Ethics Committee and conforms to the Declaration of  
12 Helsinki.

13

### 14 **Cardiovascular Magnetic Resonance Imaging**

15 All CMR scans were performed on a 1.5 Tesla clinical MR scanner (MAGNETOM Avanto or  
16 Avantofit; Siemens Healthineers AG, Erlangen, Germany). The standard CMR-protocol  
17 included high-resolution cine-images in long- and short axis view covering the left ventricle  
18 (LV), using a balanced steady state free precession sequence with retrospective ECG-gating  
19 (slice thickness: 8mm, interslice gap: 2mm, echo time: 1.19ms, repetition time: 2.83ms, 22  
20 lines per segments, median temporal resolution: 39.9 ms (interquartile range (IQR): 38.4-  
21 46.1), frame rate: 25 frames per second, flip angle: 70°, field of view: 380x310mm, matrix:  
22 320x260, voxel size: 2.6x1.8x8.0mm<sup>3</sup>, parallel imaging mode: GRAPPA (generalized  
23 autocalibrating partial parallel acquisition) with acceleration factor 2). ECG-triggered, phase-  
24 sensitive inversion recovery sequences were used to obtain late gadolinium enhancement  
25 (LGE) images 15-20 minutes after application of a 0.2 mmol/kg body mass gadolinium-

1 contrast bolus. Standard software (Circle Cardiovascular Imaging, Calgary, Canada) was used  
2 for post-processing-analyses with semi-automatic detection of LV and right ventricular endo-  
3 and epicardial borders. Papillary muscles were excluded from myocardial mass (MM) and  
4 included in the LV volume. End-diastolic volume (EDV) and end-systolic volume (ESV)  
5 were then divided by the body surface area (BSA) [m<sup>2</sup>] to obtain indexed values (EDVi and  
6 ESVi). To calculate BSA, the Du Bois-formula was used (12).

7 MAD was defined as the presence of detachment  $\geq 1$ mm between the mitral annulus and the  
8 ventricular myocardium, affecting the area under the posterior valve leaflet (3). Extent of  
9 MAD was measured longitudinally as distance from atrial valve leaflet junction to the top of  
10 the LV myocardium, at end-systole, in long-axis cine-images (figure 4). Only patients with a  
11 CMR of sufficient quality to decide whether MAD is present or not were included in this  
12 study, in order to avoid false-positive diagnoses of MAD (so called ‘pseudo-MAD’ that is  
13 feigned by juxtaposition of the posterior leaflet (13)). To determine the particular affected  
14 mitral segments, suitable short-axis slices were used.

15 MVP was defined as superior displacement  $\geq 2$ mm of any part of the mitral leaflet beyond the  
16 mitral annulus (3, 14). Systolic curling motion was defined as unusual systolic motion of the  
17 posterior mitral ring on the adjacent myocardium (15), as illustrated in figure 3. MAD-  
18 presence and –extent as well as presence of MVP were conducted in full by two independent  
19 observers blinded to clinical data, each with several years of experience in CMR diagnosis  
20 (AM, 13 years, EuroCMR level II certified and FT, 3 years).

21 To quantify LGE, ‘hyper-enhancement’ was defined as  $\geq 5$  standard deviations above the  
22 signal intensity of remote myocardium in the opposite segment of the left ventricle. LGE was  
23 then measured on consecutive short-axis slices, infarct size is presented as a percentage of LV  
24 myocardial mass.

25

## 1 **Statistical Analysis**

2 SPSS Statistics 26.0 (IBM, Armonk, NY, USA) was used for statistical analyses. All results  
3 for continuous variables are expressed as medians with corresponding IQR, categorical  
4 variables as absolute numbers and percentages. Differences in continuous and categorical  
5 variables between two groups were tested by Mann-Whitney U-test and chi-square test,  
6 respectively. A p-value <0.05 was considered as statistically significant. Logistic regression  
7 analysis was performed to evaluate independent markers for OHCA of unknown cause as well  
8 as independent markers for MAD; variables with a p-value <0.10 in univariable analysis and  
9 within these the variables of clinical relevance were included in our multivariable models.



## 1 **Results**

### 2 **Baseline patient characteristics**

3 For the current retrospective analysis, 86 OHCA patients were included. All patients  
4 underwent cardio-pulmonary resuscitation (CPR), with a median age of 56 years (IQR: 41-  
5 67). CMR was performed 5 days after resuscitation (IQR: 49 days before – 9 days after). At  
6 hospital discharge, no definite reason for CA was found after excluding coronary/cardiac,  
7 infectious, thromboembolic, genetic/congenital or metabolic conditions as well as  
8 intoxications, in 34 patients (40%). These patients are referred to as ‘unknown-cause OHCA’.  
9 Patient inclusion criteria as well as the particular causes for CA are listed in figure 2. Baseline  
10 characteristics are shown in table 1.

11

### 12 **Mitral Annular Disjunction**

13 Overall, MAD was present in 28% of OHCA patients (n=24), with a median MAD-extent of  
14 5.7mm (IQR: 4.5-10.3), ranging from 2.8 to 14.3mm. Patients with MAD were significantly  
15 younger (40 years [IQR: 32-52] vs. 61 years [IQR: 50-70],  $p<0.001$ ) and more often female  
16 (75% vs. 29%,  $p<0.001$ ). Moreover, MAD-patients had a lower BMI (23kg/m<sup>2</sup> [IQR: 20-26]  
17 vs. 26kg/m<sup>2</sup> [IQR: 23-29],  $p=0.006$ ) and a lower prevalence of diabetes, hypertension and  
18 hypercholesterolemia (all  $p<0.03$ ). Within MAD-patients, 8 showed systolic curling motion  
19 (33%). MVP was present in 26 patients (30%; with MAD: n=15 [63%] vs. without MAD:  
20 n=11 [18%],  $p<0.001$ ). A detailed comparison of patients with and without MAD is shown in  
21 table 2.

22

### 23 **Unknown-Cause Out-of-Hospital Cardiac Arrest**

24 Patients without definite substrate for CA were significantly younger (43 years [IQR: 33-55]  
25 vs. 61 years [IQR: 54-69],  $p<0.001$ ) and more often female (n=25 [74%] vs. n=11 [21%],

1 p<0.001). Nineteen OHCA patients without definite cause for CA had MAD (56%) with a  
2 median MAD-extent of 6.3mm (IQR: 4.4-10.3); of these, 10 patients (53%) with MAD had  
3 two or three mitral valve segments affected. Unknown-cause OHCA patients had a lower  
4 body mass index (BMI, 24kg/m<sup>2</sup> [IQR: 21-27] vs. 26kg/m<sup>2</sup> [IQR: 23-29], p=0.007)) and a  
5 lower prevalence of arterial hypertension (26% vs. 62%, p=0.001) and hypercholesterolemia  
6 (15% vs. 46%, p=0.003). Before hospitalization, atrial fibrillation occurred only in patients  
7 with a definite cause for CA (n=7, 13%).

8 A total of 83 OHCA patients (97%) were evaluated for the presence of any CAD, either by  
9 coronary angiography (performed in 63 patients (76%) on the day of CPR [IQR: 0-6 days  
10 after]) or by coronary computed tomography angiography (CTA) (in 52 patients (60%)  
11 performed on the day of CPR [IQR: 2 days before - 1 day after]). Combined, these two  
12 modalities resulted in an overall CAD-prevalence of 53%. CAD was significantly more  
13 common in patients with a definable cause for OHCA (73% vs. 24%, p<0.001).

14 MAD was shown to be significantly associated with unknown-cause OHCA univariably (odds  
15 ratio (OR): 11.91, 95% confidence interval (CI): 3.79-37.37, p<0.001) and to be an  
16 independent marker of unknown-cause OHCA after adjustment for age, hypertension and  
17 hypercholesterolemia (OR: 8.49, 95%CI: 2.37-30.41, p=0.001) by logistic regression analysis.

18 Results of uni- and multivariable analysis are listed in table 3.

19

## 20 **CMR measurements**

21 In unknown-cause OHCA patients (n= 34, 40%), CMR was performed 6 days after CPR  
22 (IQR: 6-8). In 6 of these, CMR was performed before CPR, with specific indications  
23 including evaluation of ventricular extrasystoles (n=2), tachyarrhythmia (n=2) or suspected  
24 (but eventually not confirmed) myocarditis (n=2). In the remaining 28 patients, CMR was  
25 performed in the course of diagnostic workup of CA.

1 In CMR, LV ejection fraction (EF) differed significantly between unknown-cause OHCA  
2 patients and those with a definite cause (49% [IQR: 43-56] vs. 41% [IQR: 33-50],  $p=0.030$ ),  
3 as did EDVi, ESVi and MM (all  $p<0.03$ ). Dichotomized at a median LV-EF of 49%, patients  
4 with a lower LV-EF had their scan 4.8 days after CPR, while the patient group with an LV-EF  
5 above the median had their scan 7.4 days after CPR ( $p=0.013$ ). Furthermore, LV-EF  
6 correlated significantly with days between CPR and CMR (spearman's rho: 0.574,  $p<0.001$ ).  
7 Contrast agent was administered in 82 patients (95%). LGE was found in 39 patients (48%,  
8 30 ischemic vs. 9 non-ischemic pattern), with unknown-cause OHCA patients presenting  
9 significantly less common with LGE (9% vs. 72%,  $p<0.001$ ). An ischemic LGE pattern was  
10 found in 6% of unknown-cause patients ( $n=2/32$ , in both cases small-focal areas) and in 56%  
11 of definite-cause patients ( $n=28/50$ ). Overall, MAD-patients showed LGE significantly less  
12 often ( $n=5/24$ , 21% vs.  $n=34/58$ , 59%,  $p=0.002$ ) compared to patients without MAD presence.  
13 No MAD-patient showed papillary muscle enhancement. A detailed list of CMR  
14 measurements is shown in table 1 and 2, respectively.  
15 Within unknown-cause OHCA patients, only 3/32 (9%) patients showed LGE at CMR, with  
16 two patients each presenting with a single small-focal ischemic LGE (one in the right  
17 coronary artery area (RCA) affecting 0.7% of LV-MM and one in the left anterior descending  
18 artery (LAD) affecting 2.1% of LV-MM), both likely due to thromboembolic events and both  
19 remained without clinical signs or abnormalities on coronary angiography. The one patient in  
20 this group showing a non-ischemic pattern had LGE of the basal posterolateral wall without  
21 affecting the papillary muscles (affecting 3.9% of LV-MM).  
22 In the definite-cause OHCA group, 28/50 patients (56%) had ischemic LGE (culprit lesions:  
23 LAD –  $n=13$  [46%]; RCA –  $n=8$  [29%]; circumflex artery (CX) –  $n=2$  [7%]; multiple –  $n=5$   
24 [18%]; median infarct size 11% of LV-MM, IQR: 7-21) and 8/50 patients had non-ischemic  
25 LGE (1.7% of LV-MM, IQR: 1.1-1.9) of the posterolateral wall without affecting any  
26 papillary muscle. Papillary muscle enhancement was found in 13% of patients ( $n=11$ , all of

1 them with ischemic LGE; 1 unknown-cause [3%] vs. 10 definite-cause [20%],  $p=0.172$ ) and  
2 affected the posterolateral papillary muscle in 10 patients (91%, 3 with both papillary muscles  
3 affected, 7 with isolated posterolateral papillary muscle enhancement). All patients with  
4 papillary enhancement had ischemic LGE, none of the MAD-patients had papillary muscle  
5 enhancement.

6

## 7 **Rhythmological Features**

8 A detailed list of rhythmological features is shown in table 4. At the index event, the initial  
9 rhythm (recorded in 81 patients, 94%) showed no difference between OHCA patients with  
10 unknown cause and with definable cause ( $p=0.155$ ) or between patients with and without  
11 MAD ( $p=0.051$ ), with MAD-patients presenting exclusively with ventricular fibrillation (VF).  
12 Post-CPR-ECG on the day of index CA was available in 79 patients (92%) and differed  
13 significantly between unknown-cause OHCA patients and those with a definable cause  
14 concerning repolarization disorders ( $p=0.020$ ), primarily concerning ST-elevation (12/47,  
15 26% vs. 1/32, 3%), with the other entities encompassing unspecific repolarization disorders.  
16 There was no significant difference regarding rhythm ( $p=0.568$ ), electrical heart axis  
17 ( $p=0.349$ ), P-wave morphology (0.211), bundle branch blocks ( $p=0.337$ ), pathological Q-  
18 waves ( $p=0.843$ ), signs of hypertrophy ( $p=0.387$ ) and specific time intervals (PQ, QRS,  
19 QT/QTc, all  $p>0.2$ ).

20 According to patient files, a total of 7 patients (8%) showed a history of arrhythmological  
21 conditions prior to the index event. During hospitalization, arrhythmic episodes were recorded  
22 in 14 patients (16%). In the aftermath of index hospitalization, over a median observation  
23 period of 3.3 years (IQR: 1.8-6.7), new episodes of arrhythmia were documented in 8 patients  
24 (9%). Between unknown-cause and definable-cause OHCA patients, no significant difference  
25 concerning peri-CPR rhythmological events was shown (before:  $p=0.494$ , during

1 hospitalization:  $p=0.646$ , afterwards:  $p=0.444$ ). The same accounts between patients with and  
2 without MAD (before:  $p=0.733$ , during hospitalization:  $p=0.912$ , afterwards:  $p=0.304$ ).

3

#### 4 **Laboratory Analysis**

5 Within laboratory parameters, unknown-cause OHCA patients showed significantly lower  
6 values of serum creatinine (difference:  $0.25\text{mg/dl}$ ,  $p<0.001$ ), calcium ( $0.1\text{mmol/l}$ ,  $p=0.009$ ),  
7 peak troponin T ( $409\text{ng/ml}$ ,  $p=0.017$ ) and peak N-terminal pro-brain-type natriuretic peptide  
8 ( $565\text{ng/l}$ ,  $p=0.048$ ). Results of lab analyses are shown in table 1.

9

## 1 **Discussion**

2 This study is the first to investigate the role of MAD particularly in OHCA patients  
3 undergoing CMR imaging. Our results can be summarized as follows: a) MAD is a common  
4 feature in patients with unknown-cause OHCA, whilst b) it is far less common in patients  
5 with a definable cause of OHCA; c) MAD-patients in our study showed generally less  
6 comorbidities for cardiovascular events, however d) MAD was revealed to be an independent  
7 marker for unknown-cause OHCA after adjustment for age, hypertension and  
8 hypercholesterolemia.

9

### 10 **Prevalence of unknown-cause OHCA**

11 In the present analysis, no definite cause for CA could be found in 40% of OHCA patients  
12 despite profound diagnostics. This number exceeds the observations of a German register  
13 study investigating 33,772 OHCA patients between 2007 and 2017. In that study, the  
14 proportion of unknown-cause OHCA was 17% (16). A possible explanation for this  
15 discrepancy is the fact that in most cases of definable-cause OHCA (e.g. myocardial  
16 infarction), there is no general recommendation for further investigation via CMR (17).  
17 Furthermore, due to its limited availability, CMR is usually only performed when the most  
18 common reasons for CA can be excluded beforehand. This additionally increases the  
19 percentage of unknown-cause OHCA in our study, in which, however, performance of CMR  
20 is a central inclusion criterion.

21

### 22 **MAD in unknown-cause OHCA**

23 In this study, MAD was defined as end-systolic disjunction extent of at least 1mm, referring  
24 to an important forerunner-study by Dejgaard et al. (3). This approach can currently be  
25 regarded as a quite strict definition of MAD, as many other studies tended to define MAD as

1 disjunction of any extent (6, 11, 18). However, in some rare studies, also larger cut-offs can  
2 be found, such as 2mm (19) and 5mm (20). As the minimum MAD in this present study was  
3 2.8mm, shifting the threshold to 2mm would have had no effect on the outcome; however, a  
4 threshold of 5mm would have decreased the MAD-prevalence to 17% (n=15, 12 with  
5 unknown-cause OHCA, 35% vs. 3 with definable-cause OHCA, 6%,  $p<0.001$ ).

6 One main finding of our study was that MAD was diagnosed significantly more often in  
7 unknown-cause OHCA patients, while these patients generally showed distinctly less  
8 comorbidities, especially in terms of age, BMI, blood pressure, hypercholesterolemia and  
9 CAD-prevalence. According to a cohort study by Essayagh et al. in 595 MVP-patients, the  
10 presence of disjunction was an independent risk factor for the occurrence of arrhythmic events  
11 in the long term (21). This finding is in line with a study by Dejgaard et al., which found  
12 severe arrhythmic events in 12% of MAD-patients and postulated MAD to be an  
13 arrhythmogenic risk factor itself, independent of concomitant prolapse (3). Accordingly,  
14 multivariate logistic regression analysis in the present study revealed MAD to be an  
15 independent marker of OHCA of unknown cause after adjustment for age, hypertension and  
16 hypercholesterolemia. There are hardly any other data available about the role of MAD in  
17 OHCA. However, a study by Lee et al. investigating the association of MVP and severe  
18 arrhythmias indicated that systolic curling motion in MAD was a strong and independent  
19 predictor of these events (15). In the present study, systolic curling motion was more common  
20 in unknown-cause OHCA patients; however, this difference was not significant, which is  
21 probably due to the small number of MAD in definable-cause OHCA patients.

22

### 23 **Features of unknown-cause OHCA**

24 Besides MAD, female sex has proven to be a strong prognostic marker for unknown-cause  
25 OHCA, with 74% of these patients being female. Referring to the above-mentioned register  
26 study, almost 65% of all OHCA patients were male, which is in line with our study (58%).

1 However, the percentage of women with unknown-cause OHCA in that register study was  
2 40%. This is most likely due to the high rate of cardiac events in the definable-cause group  
3 (83%), which is accordingly more common in men (16). Then, although patients in the  
4 unknown-cause group in general had structurally normal hearts, some of them still showed an  
5 EF below 40%. A very sensible explanation for this phenomenon can be found in a study by  
6 Gonzalez et al., describing a marked decrease of LV-EF up to 25% due to cardiac arrest,  
7 hinting that perhaps these patients with a lower EF at CMR had a normal ventricular function  
8 pre-CPR (22). Additionally, it can be assumed that the partly quite short interval between  
9 CPR and CMR also plays a non-neglectable role here, as the LV function underlies a high  
10 variability during the first few days after cardiac recovery, which was shown by Kalra et al. in  
11 OHCA patients via echocardiography (23). Another finding, which is probably a result of the  
12 high frequency of cardiac triggers for CA in the present study is that LGE was significantly  
13 less common in unknown-cause OHCA and in MAD-patients. LGE was found to be a strong  
14 predictor for definable-cause OHCA. The percentage of patients with LGE in the definable-  
15 cause group (72%) is in line with a study by Neilan et al., detecting LGE in 71% of a patient  
16 cohort of 137 CA survivors (24). Contrary, the proportion of patients showing LGE in the  
17 unknown-cause group was less than a tenth. This could be due to the young age of patients in  
18 this group as well as the low risk profile.

19

## 20 **Epidemiologic features of MAD**

21 In the present study, MAD was evident in 28% of patients in at least one segment of the  
22 posterior mitral leaflet. This is approximately in line with three studies reporting the  
23 prevalence of MAD via transthoracic echocardiography in MVP-patients (MAD in 22%) (25),  
24 via 3D-TEE in a mixed-patients cohort (27%) (15) and via CMR in myxomatous mitral valve  
25 disease (35%) (6). However, according to a recently published study by Toh et al.,  
26 investigating the prevalence of MAD in a population of 98 patients without structural heart



1 disease via CT, the true prevalence of MAD could be up to 96% (5). This marked difference  
2 to our present study could be at least partly due to the underlying examination method, as CT  
3 shows a higher spatial resolution than CMR, which also manifests itself in a larger median  
4 MAD-extent in our study (5.7mm vs. 3.0mm in Toh et al.).  
5 The ratio of 75% women in MAD-patients is in line with a study by Perazzolo Marra et al.,  
6 describing MAD as a constant feature of arrhythmogenic MVP (4). According to a large  
7 investigation of MVP prevalence in the course of the Framingham Study, MVP in general  
8 was shown to be a feature mainly affecting young women (26). As MAD is very often still  
9 accompanied by MVP, this would be in agreement with our data. However, data about sex  
10 distribution in MAD are currently rather inconsistent (2) and studies are still lacking.

11

## 12 **MAD and Arrhythmias**

13 Interestingly, the difference in initial ECG findings at CPR between patients with and without  
14 MAD was of borderline significance, with all 24 MAD-patients showing VF at first medical  
15 contact. Overall, 84% of patients in the present study initially presented with a shockable  
16 rhythm, which is in line with a study by Majewski et al. investigating 871 OHCA patients that  
17 survived the first 30 days after CPR (27). In the first post-CPR-ECG, the main difference  
18 between the definable-cause and the unknown-cause group lies in the presence of  
19 repolarization disorders, being primarily due to the high ratio of myocardial infarctions  
20 showing ST-elevation in the first group, with the remaining entities being rather unspecific  
21 repolarization abnormalities. There are no data available about arrhythmias requiring CPR in  
22 MAD; however, as this study's MAD-patients were at a distinctly younger age than patients  
23 without MAD and showed significantly less risk factors (i.e. diabetes, hypertension,  
24 hypercholesterolemia, CAD), these findings hint that the disjunction itself bears  
25 arrhythmogenic potential, especially in favour of ventricular arrhythmias (3). Further,  
26 although being more and more regarded as an arrhythmogenic entity itself, it is not yet clear

1 why the presence of MAD seemingly predisposes for the development of severe arrhythmic  
2 events. Some studies postulate fibrosis of the papillary muscles as well as myocardial stretch  
3 by a contingently prolapsing leaflet as the primary pathophysiology of the MAD arrhythmic  
4 syndrome (28, 29). Another hypothesis involving damage or tissue change of the cardiac  
5 conduction system has not yet been sufficiently investigated (3, 30), but would on the other  
6 hand explain the increased risk of arrhythmic events in MAD-patients even without presence  
7 of MVP (3) or, as shown in our study, LGE. The fact that only 9% of unknown-cause patients  
8 in our study showed replacement fibrosis is probably due to a compound of these and maybe  
9 still unknown pathophysiological mechanisms that result in arrhythmias even before being  
10 measurable.

11

12 **Limitations.** We acknowledge that this study bears some limitations, with the most important  
13 being its retrospective nature, which results in partly incomplete patient history records and  
14 further course after discharge. Furthermore, the selected patient population is subject to a  
15 certain selection bias, as the percentage of patients with unknown-cause OHCA was  
16 overproportionally high, due to the availability of CMR imaging being a central inclusion  
17 criterion and the less common referral to CMR in definite-cause OHCA. Then, a probably  
18 very helpful tool and valuable addition to our analysis concerning tissue characterization in  
19 MAD could be parametric myocardial mapping. However, these sequences were not obtained  
20 in many patients due to these patients having been scanned before mapping sequences were  
21 commercially available. Lastly, CMR protocols were not entirely uniform due to the fact that  
22 CMR was primarily performed as a part of clinical routine rather than a scientific study;  
23 however, all patients were adequately evaluable in terms of MAD and cardiac function.

24

25 **Conclusion.** MAD is a common feature in OHCA patients without a definable substrate for  
26 CA. MAD-patients were younger, more often female and typically presented with a lower risk

1 profile. However, the mere presence of MAD seems to be an independent factor of OHCA  
2 without clear trigger. Further research to characterize and understand the role of MAD in CA  
3 is needed.

4

1 **Acknowledgements, Funding and Data Availability**

2 This study did not receive any specific grant from funding agencies in the public, commercial,  
3 or not-for-profit sectors.

4 There is no conflict of interest.

5 The data underlying this article will be shared on reasonable request to the corresponding  
6 author.

7

8

## 1 **References**

- 2 1. Hutchins GM, Moore GW, Skoog DK. The association of floppy mitral valve with  
3 disjunction of the mitral annulus fibrosus. *N Engl J Med*. 1986;314(9):535-40.
- 4 2. Bennett S, Thamman R, Griffiths T, et al. Mitral annular disjunction: A systematic  
5 review of the literature. *Echocardiography*. 2019;36(8):1549-58.
- 6 3. Dejgaard LA, Skjolsvik ET, Lie OH, et al. The Mitral Annulus Disjunction  
7 Arrhythmic Syndrome. *J Am Coll Cardiol*. 2018;72(14):1600-9.
- 8 4. Perazzolo-Marra M, Basso C, De-Lazzari M, et al. Morphofunctional Abnormalities of  
9 Mitral Annulus and Arrhythmic Mitral Valve Prolapse. *Circ Cardiovasc Imaging*.  
10 2016;9(8):e005030.
- 11 5. Toh H, Mori S, Izawa Y, et al. Prevalence and extent of mitral annular disjunction in  
12 structurally normal hearts: comprehensive 3D analysis using cardiac computed tomography.  
13 *Eur Heart J Cardiovasc Imaging*. 2021;22(6):614-22.
- 14 6. Essayagh B, Iacuzio L, Civaia F, et al. Usefulness of 3-Tesla Cardiac Magnetic  
15 Resonance to Detect Mitral Annular Disjunction in Patients With Mitral Valve Prolapse. *Am*  
16 *J Cardiol*. 2019;124(11):1725-30.
- 17 7. Bennett S, Phan T, Patwala A, et al. Surviving cardiac arrest from mitral annular  
18 disjunction: A case report. *Echocardiography*. 2019;36(7):1405-8.
- 19 8. Datta I, Dawdy J, Afonso L. A case of variant parachute mitral valve associated with  
20 mitral annular disjunction arrhythmic syndrome. *Echocardiography*. 2021;38(11):1966-9.
- 21 9. Sasson C, Rogers MA, Dahl J, Kellermann AL. Predictors of survival from out-of-  
22 hospital cardiac arrest: a systematic review and meta-analysis. *Circ Cardiovasc Qual*  
23 *Outcomes*. 2010;3(1):63-81.
- 24 10. Myat A, Song KJ, Rea T. Out-of-hospital cardiac arrest: current concepts. *Lancet*.  
25 2018;391(10124):970-9.

- 1 11. Mantegazza V, Volpato V, Gripari P, et al. Multimodality imaging assessment of  
2 mitral annular disjunction in mitral valve prolapse. *Heart*. 2021;107(1):25-32.
- 3 12. Du-Bois D, Du-Bois EF. A formula to estimate the approximate surface area if height  
4 and weight be known. 1916. *Nutrition*. 1989;5(5):303-11; discussion 12-3.
- 5 13. Faletra FF, Leo LA, Paiocchi VL, et al. Morphology of Mitral Annular Disjunction in  
6 Mitral Valve Prolapse. *J Am Soc Echocardiogr*. 2022;35(2):176-86.
- 7 14. Zoghbi WA, Adams D, Bonow RO, et al. Recommendations for Noninvasive  
8 Evaluation of Native Valvular Regurgitation: A Report from the American Society of  
9 Echocardiography Developed in Collaboration with the Society for Cardiovascular Magnetic  
10 Resonance. *J Am Soc Echocardiogr*. 2017;30(4):303-71.
- 11 15. Lee JH, Uhm JS, Suh YJ, et al. Usefulness of cardiac magnetic resonance images for  
12 prediction of sudden cardiac arrest in patients with mitral valve prolapse: a multicenter  
13 retrospective cohort study. *BMC Cardiovasc Disord*. 2021;21(1):546.
- 14 16. Gässler H, Fischer M, Wnent J, Seewald S, Helm M. Outcome after pre-hospital  
15 cardiac arrest in accordance with underlying cause. *Resuscitation*. 2019;138:36-41.
- 16 17. Ibanez B, James S, Agewall S, et al. 2017 ESC Guidelines for the management of  
17 acute myocardial infarction in patients presenting with ST-segment elevation: The Task Force  
18 for the management of acute myocardial infarction in patients presenting with ST-segment  
19 elevation of the European Society of Cardiology (ESC). *Eur Heart J*. 2018;39(2):119-77.
- 20 18. Gatti M, Palmisano A, Esposito A, et al. Feature tracking myocardial strain analysis in  
21 patients with bileaflet mitral valve prolapse: relationship with LGE and arrhythmias. *Eur*  
22 *Radiol*. 2021;31(10):7273-82.
- 23 19. Figliozzi S, Georgiopoulos G, Lopes PM, et al. Myocardial Fibrosis at Cardiac MRI  
24 Helps Predict Adverse Clinical Outcome in Patients with Mitral Valve Prolapse. *Radiology*.  
25 2022:220454.

- 1 20. Kukavica D, Guglielmo M, Baggiano A, et al. Arrhythmic Mitral Valve Prolapse:  
2 Introducing an Era of Multimodality Imaging-Based Diagnosis and Risk Stratification.  
3 *Diagnostics (Basel)*. 2021;11(3).
- 4 21. Essayagh B, Sabbag A, Antoine C, et al. The Mitral Annular Disjunction of Mitral  
5 Valve Prolapse: Presentation and Outcome. *JACC Cardiovasc Imaging*. 2021;14(11):2073-87.
- 6 22. Gonzalez MM, Berg RA, Nadkarni VM, et al. Left ventricular systolic function and  
7 outcome after in-hospital cardiac arrest. *Circulation*. 2008;117(14):1864-72.
- 8 23. Kalra R, Bartos JA, Kosmopoulos M, et al. Echocardiographic evaluation of cardiac  
9 recovery after refractory out-of-hospital cardiac arrest. *Resuscitation*. 2020;154:38-46.
- 10 24. Neilan TG, Farhad H, Mayrhofer T, et al. Late gadolinium enhancement among  
11 survivors of sudden cardiac arrest. *JACC Cardiovasc Imaging*. 2015;8(4):414-23.
- 12 25. Torras O, Hourdain J, Deharo J, et al. Exhaustive echocardiographic phenotyping of  
13 mitral valve prolapse in a single center: 'Sever myxomatous mitral valve disease' as a specific  
14 entity? *Arch Cardiovasc Dis Suppl*. 2019;11(52).
- 15 26. Savage DD, Garrison RJ, Devereux RB, et al. Mitral valve prolapse in the general  
16 population. 1. Epidemiologic features: the Framingham Study. *Am Heart J*. 1983;106(3):571-  
17 6.
- 18 27. Majewski D, Ball S, Bailey P, Bray J, Finn J. Long-term survival among OHCA  
19 patients who survive to 30 days: Does initial arrest rhythm remain a prognostic determinant?  
20 *Resuscitation*. 2021;162:128-34.
- 21 28. Basso C, Perazzolo-Marra M, Rizzo S, A, et al. Arrhythmic Mitral Valve Prolapse and  
22 Sudden Cardiac Death. *Circulation*. 2015;132(7):556-66.
- 23 29. Sriram CS, Syed FF, Ferguson ME, et al. Malignant bileaflet mitral valve prolapse  
24 syndrome in patients with otherwise idiopathic out-of-hospital cardiac arrest. *J Am Coll  
25 Cardiol*. 2013;62(3):222-30.

1 30. Bharati S, Granston AS, Liebson PR, Loeb HS, Rosen KM, Lev M. The conduction  
2 system in mitral valve prolapse syndrome with sudden death. *Am Heart J.* 1981;101(5):667-  
3 70.  
4  
5



1 **Figure Legends**

2 **Figure 1.** Study synopsis - mitral annular disjunction occurs frequently in unknown-cause  
3 out-of-hospital cardiac arrest and represents an independent marker after adjustment for age,  
4 hypertension and hypercholesterolemia. (Illustration created with biorender.com). *MAD:*  
5 *mitral annular disjunction, OHCA: out-of-hospital cardiac arrest.*

6  
7 **Figure 2.** Flowchart of in- and exclusion, displaying the definable causes of CPR. *CA:*  
8 *cardiac arrest, CMR: cardiac magnetic resonance imaging, CPR: cardio-pulmonary*  
9 *resuscitation, MAD: mitral annular disjunction, OHCA: out-of-hospital cardiac arrest.*

10  
11 **Figure 3.** Three- (A) and four-chamber (B) view of a female patient in her 20s with out-of-  
12 hospital cardiac arrest of unknown cause, showing a distinct mitral annular disjunction with a  
13 systolic curling (arrow) of the P2- and P1-segment of the mitral valve with a maximum extent  
14 of 14.2mm.

15  
16 **Figure 4.** The detection of mitral annular disjunction and the measurement of its extent  
17 depends very much on the correct phase: this patient showed a marked disjunction of the P1-  
18 segment in end-systole (B), which is not visible at end-diastole (A). Panel (C) shows the  
19 positioning of the measuring tool as was used in this current study.

20  
21

## 1 Tables

|                                              | <b>All patients<br/>(n=86)</b> | <b>definable-cause<br/>(n=52)</b> | <b>unknown-cause<br/>(n=34)</b> | <b>p-value</b>   |
|----------------------------------------------|--------------------------------|-----------------------------------|---------------------------------|------------------|
| Age at CPR, years                            | 56 (41-67)                     | 61 (54-69)                        | 43 (33-55)                      | <b>&lt;0.001</b> |
| Female, %                                    | 36 (42)                        | 11 (21)                           | 25 (74)                         | <b>&lt;0.001</b> |
| BMI, kg/m <sup>2</sup>                       | 25 (22-28)                     | 26 (23-29)                        | 24 (21-27)                      | <b>0.007</b>     |
| MAD, n(%)                                    | 24 (28)                        | 5 (10)                            | 19 (56)                         | <b>&lt;0.001</b> |
| MAD – No. of affected segments               |                                |                                   |                                 |                  |
| - 0                                          | 62 (72)                        | 47 (90)                           | 15 (44)                         | <b>&lt;0.001</b> |
| - 1                                          | 13 (15)                        | 4 (8)                             | 9 (26)                          | 0.098            |
| - ≥2                                         | 11 (13)                        | 1 (2)                             | 10 (29)                         | <b>0.001</b>     |
| MAD-extent, mm (24/86 patients)              | 5.7 (4.5-10.3)                 | 5.4 (3.8-9.0)                     | 6.3 (4.4-10.3)                  | 0.534            |
| Systolic Curling, n(%) (24/86 patients)      | 8/24 (33)                      | 1/5 (20)                          | 7/19 (37)                       | 0.477            |
| MVP, n(%)                                    | 26 (30)                        | 13 (25)                           | 13 (38)                         | 0.191            |
| - anterior                                   | 14 (16)                        | 9 (17)                            | 5 (15)                          | 0.993            |
| - posterior                                  | 3 (3)                          | 2 (3)                             | 1 (3)                           | 0.998            |
| - bileaflet                                  | 9 (10)                         | 2 (3)                             | 7 (21)                          | 0.100            |
| <b>Risk Profile</b>                          |                                |                                   |                                 |                  |
| Smoker, n(%)                                 | 27 (31)                        | 18 (35)                           | 9 (26)                          | 0.442            |
| Diabetes, n(%)                               | 11 (13)                        | 9 (17)                            | 2 (6)                           | 0.090            |
| Hypertension, n(%)                           | 41 (48)                        | 32 (62)                           | 9 (26)                          | <b>0.001</b>     |
| Hypercholesterolemia, n(%)                   | 29 (34)                        | 24 (46)                           | 5 (15)                          | <b>0.003</b>     |
| Positive Family History, n(%)                | 10 (12)                        | 6 (12)                            | 4 (12)                          | 0.961            |
| Atrial Fibrillation, n(%)                    | 7 (8)                          | 7 (13)                            | 0 (0)                           | <b>0.029</b>     |
| CAD (CT or invasively, 83/86 patients), n(%) | 44/83 (53)                     | 37/51 (73)                        | 7/32 (24)                       | <b>&lt;0.001</b> |
| <b>Laboratory Parameters</b>                 |                                |                                   |                                 |                  |
| Admission Glucose, mg/dl                     | 167 (125-235)                  | 162 (125-246)                     | 173 (121-218)                   | 0.848            |
| Creatinine, mg/dl                            | 1.03 (0.85-1.24)               | 1.15 (0.93-1.43)                  | 0.90 (0.76-1.05)                | <b>&lt;0.001</b> |
| Sodium, mmol/l                               | 139 (138-141)                  | 139 (137-141)                     | 140 (138-142)                   | 0.558            |
| Potassium, mmol/l                            | 3.8 (3.5-4.3)                  | 4.0 (3.5-4.3)                     | 3.7 (3.5-4.2)                   | 0.256            |
| Calcium, mmol/l                              | 2.2 (2.1-2.3)                  | 2.2 (2.1-2.3)                     | 2.1 (2.0-2.2)                   | <b>0.009</b>     |
| Hemoglobin, g/l                              | 136 (126-149)                  | 139 (128-151)                     | 132 (121-144)                   | 0.315            |
| Leukocytes, G/l                              | 11 (8-14)                      | 11 (8-15)                         | 11 (8-14)                       | 0.931            |
| CRP, mg/dl                                   | 0.3 (0.1-1.2)                  | 0.3 (0.1-1.7)                     | 0.2 (0.1-0.7)                   | 0.329            |
| INR                                          | 1.1 (1.0-1.2)                  | 1.1 (1.0-1.2)                     | 1.1 (1.1-1.3)                   | 0.363            |
| Admission hs Troponin T, ng/ml               | 43 (17-191)                    | 53 (20-306)                       | 41 (15-181)                     | 0.327            |
| Peak hs-Troponin T, ng/ml                    | 223 (119-1334)                 | 598 (149-3874)                    | 189 (104-441)                   | <b>0.017</b>     |
| Admission CK, U/l                            | 156 (87-341)                   | 153 (79-343)                      | 156 (96-345)                    | 0.686            |
| Peak CK, U/l                                 | 740 (167-2032)                 | 768 (137-2645)                    | 727 (273-1163)                  | 0.927            |
| Peak NT-proBNP, ng/l                         | 710 (311-1805)                 | 1050 (394-3050)                   | 485 (182-1326)                  | <b>0.048</b>     |
| <b>CMR Parameters</b>                        |                                |                                   |                                 |                  |
| LV EF, %                                     | 47 (38-53)                     | 41 (33-50)                        | 49 (43-56)                      | <b>0.030</b>     |
| LV EDVi, ml/m <sup>2</sup>                   | 100 (80-117)                   | 106 (88-132)                      | 91 (73-110)                     | <b>0.027</b>     |
| LV ESVi, ml/m <sup>2</sup>                   | 52 (41-67)                     | 58 (49-85)                        | 48 (34-59)                      | <b>0.015</b>     |
| LV Myocardial Mass, g                        | 116 (97-147)                   | 142 (111-168)                     | 110 (85-121)                    | <b>&lt;0.001</b> |
| RV EF, %                                     | 50 (39-56)                     | 45 (34-54)                        | 52 (46-57)                      | 0.096            |
| RV EDVi, ml/m <sup>2</sup>                   | 87 (71-106)                    | 94 (73-109)                       | 81 (68-103)                     | 0.203            |
| RV ESVi, ml/m <sup>2</sup>                   | 45 (33-56)                     | 49 (42-58)                        | 43 (31-50)                      | 0.064            |
| LGE (82/86 patients), n(%)                   | 39/82 (48)                     | 36/50 (72)                        | 3/32 (9)                        | <b>&lt;0.001</b> |

1 **Table 1.** Baseline characteristics.

2

3 *BMI: body mass index, CAD: coronary artery disease, CK: creatine kinase, CPR: cardio-*  
4 *pulmonary resuscitation, CRP: C-reactive protein, CT: computed tomography, EDVi: indexed*  
5 *end-diastolic volume, EF: ejection fraction, ESVi: indexed end-systolic volume, hs: high-*  
6 *sensitive, INR: international normalized ratio, LGE: late gadolinium enhancement, LV: left*  
7 *ventricular, MAD: mitral annular disjunction, MVP: mitral valve prolapse, NT-proBNP: N-*  
8 *terminal pro-B-type natriuretic peptide, RV: right ventricular.*

|                                                 | <b>MAD<br/>(n=24)</b> | <b>No MAD<br/>(n=62)</b> | <b>p-value</b>   |
|-------------------------------------------------|-----------------------|--------------------------|------------------|
| Age at CPR, years                               | 40 (32-52)            | 61 (50-70)               | <b>&lt;0.001</b> |
| Female, %                                       | 18 (75)               | 18 (29)                  | <b>&lt;0.001</b> |
| BMI, kg/m <sup>2</sup>                          | 23 (20-26)            | 26 (23-29)               | <b>0.006</b>     |
| MVP, n(%)                                       | 15 (63)               | 11 (18)                  | <b>&lt;0.001</b> |
| - anterior                                      | 7 (29)                | 7 (11)                   | 0.261            |
| - posterior                                     | 1 (4)                 | 2 (3)                    | 0.998            |
| - bileaflet                                     | 7 (29)                | 2 (3)                    | <b>0.007</b>     |
| <b>Risk Profile</b>                             |                       |                          |                  |
| Smoker, n(%)                                    | 6 (25)                | 21 (34)                  | 0.375            |
| Diabetes, n(%)                                  | 0 (0)                 | 11 (18)                  | <b>0.024</b>     |
| Hypertension, n(%)                              | 5 (21)                | 36 (58)                  | <b>0.001</b>     |
| Hypercholesterolemia                            | 3 (13)                | 26 (42)                  | <b>0.007</b>     |
| Positive Family History, n(%)                   | 2 (8)                 | 8 (13)                   | 0.523            |
| Atrial Fibrillation, n(%)                       | 0 (0)                 | 7 (11)                   | 0.078            |
| CAD (CT or invasively,<br>83/86 patients), n(%) | 4/23 (17)             | 40/60 (67)               | <b>&lt;0.001</b> |
| <b>Laboratory Parameters</b>                    |                       |                          |                  |
| Admission Glucose, mg/dl                        | 166 (120-202)         | 167 (125-246)            | 0.368            |
| Creatinine, mg/dl                               | 0.84 (0.72-1.01)      | 1.13 (0.92-1.41)         | <b>&lt;0.001</b> |
| Sodium, mmol/l                                  | 140 (138-141)         | 139 (137-142)            | 0.315            |
| Potassium, mmol/l                               | 3.7 (3.5-4.0)         | 3.9 (3.5-4.3)            | 0.240            |
| Calcium, mmol/l                                 | 2.1 (2.0-2.2)         | 2.2 (2.1-2.3)            | <b>0.021</b>     |
| Hemoglobin, g/l                                 | 131 (117-139)         | 140 (128-151)            | <b>0.032</b>     |
| Leukocytes, G/l                                 | 12 (7-15)             | 11 (8-14)                | 0.836            |
| CRP, mg/dl                                      | 0.1 (0.1-1.2)         | 0.3 (0.1-1.2)            | 0.238            |
| INR                                             | 1.1 (1.0-1.3)         | 1.1 (1.0-1.2)            | 0.829            |
| Admission hs Troponin T,<br>ng/ml               | 70 (14-187)           | 37 (19-216)              | 0.777            |
| Peak hs-Troponin T, ng/ml                       | 200 (126-681)         | 267 (104-3175)           | 0.399            |
| Admission CK, U/l                               | 187 (103-521)         | 151 (79-333)             | 0.164            |
| Peak CK, U/l                                    | 921 (361-2067)        | 504 (143-2032)           | 0.182            |
| Peak NT-proBNP, ng/l                            | 402 (131-907)         | 1064 (431-3034)          | <b>0.003</b>     |
| <b>CMR parameters</b>                           |                       |                          |                  |
| LV EF, %                                        | 47 (43-56)            | 45 (33-52)               | 0.111            |
| LV EDVi, ml/m <sup>2</sup>                      | 94 (80-111)           | 103 (79-126)             | 0.376            |
| LV ESVi, ml/m <sup>2</sup>                      | 49 (40-58)            | 56 (41-77)               | 0.158            |
| LV Myocardial Mass, g                           | 102 (85-118)          | 125 (110-160)            | <b>0.006</b>     |
| RV EF, %                                        | 54 (46-58)            | 48 (34-54)               | <b>0.043</b>     |
| RV EDVi, ml/m <sup>2</sup>                      | 85 (71-104)           | 89 (71-109)              | 0.685            |
| RV ESVi, ml/m <sup>2</sup>                      | 43 (32-49)            | 46 (33-58)               | 0.129            |
| LGE (82/86 patients), n(%)                      | 5/24 (21)             | 34/58 (59)               | <b>0.002</b>     |

1 **Table 2.** Comparison of patients with and without MAD.

2

3 *BMI: body mass index, CAD: coronary artery disease, CK: creatine kinase, CPR: cardio-*

4 *pulmonary resuscitation, CRP: C-reactive protein, CT: computed tomography, EDVi: indexed*

5 *end-diastolic volume, EF: ejection fraction, ESVi: indexed end-systolic volume, hs: high-*

6 *sensitive, INR: international normalized ratio, LGE: late gadolinium enhancement, LV: left*

- 1 *ventricular, MAD: mitral annular disjunction, MVP: mitral valve prolapse, NT-proBNP: N-*
- 2 *terminal pro-B-type natriuretic peptide, RV: right ventricular.*

|                               | OR (95% CI)         | p-value |
|-------------------------------|---------------------|---------|
| <b>Univariable Analysis</b>   |                     |         |
| MAD presence                  | 11.91 (3.79-37.37)  | <0.001  |
| MAD-extent, mm                | 1.41 (1.17-1.71)    | <0.001  |
| MAD - ≥2 segments affected    | 21.25 (2.57-175.64) | 0.005   |
| Age at CPR, yrs               | 0.96 (0.93-0.98)    | 0.002   |
| Female Sex                    | 10.35 (3.77-28.47)  | <0.001  |
| BMI, kg/m <sup>2</sup>        | 0.88 (0.79-0.98)    | 0.021   |
| Diabetes                      | 0.30 (0.06-1.49)    | 0.142   |
| Hypertension                  | 0.22 (0.09-0.59)    | 0.002   |
| Hypercholesterolemia          | 0.20 (0.07-0.60)    | 0.004   |
| Atrial Fibrillation           | 0 (0)               | 0.999   |
| CAD (CT or invasively)        | 0.11 (0.04-0.30)    | <0.001  |
| Creatinine, mg/dl             | 0.08 (0.01-0.50)    | 0.007   |
| Calcium, mmol/l               | 0.01 (0.00-0.32)    | 0.009   |
| Peak hs-Troponin T, ng/ml     | 1.00 (0.99-1.00)    | 0.051   |
| Peak NT-proBNP, ng/l          | 1.00 (1.00-1.00)    | 0.766   |
| EF, %                         | 1.04 (0.99-1.09)    | 0.091   |
| EDVi, ml                      | 0.98 (0.96-0.99)    | 0.044   |
| ESVi, ml                      | 0.98 (0.96-0.99)    | 0.037   |
| Myocardial Mass, g            | 0.97 (0.95-0.99)    | 0.001   |
| LGE                           | 0.04 (0.01-0.15)    | <0.001  |
| <b>Multivariable Analysis</b> |                     |         |
| <i>Model 1</i> <b>n = 84</b>  |                     |         |
| - MAD presence                | 8.49 (2.37-30.41)   | 0.001   |
| - Age at CPR, yrs             | 1.00 (0.97-1.04)    | 0.842   |
| - Hypertension                | 0.42 (0.12-1.43)    | 0.164   |
| - Hypercholesterolemia        | 0.36 (0.10-1.27)    | 0.111   |
| <i>Model 2</i> <b>n = 84</b>  |                     |         |
| - MAD presence                | 6.26 (1.72-22.76)   | 0.005   |
| - Female Sex                  | 4.61 (1.41-15.09)   | 0.011   |
| - Hypertension                | 0.54 (0.17-1.75)    | 0.306   |
| - Hypercholesterolemia        | 0.61 (0.16-2.23)    | 0.451   |
| <i>Model 3</i> <b>n = 81</b>  |                     |         |
| - MAD presence                | 5.03 (1.29-19.71)   | 0.020   |
| - Female Sex                  | 3.68 (1.09-12.39)   | 0.036   |
| - CAD (CT or invasively)      | 0.30 (0.09-1.05)    | 0.059   |
| - Hypertension                | 0.70 (0.20-2.45)    | 0.576   |
| <i>Model 4</i> <b>n = 83</b>  |                     |         |
| - MAD presence                | 5.23 (1.33-20.53)   | 0.018   |
| - Age at CPR, yrs             | 1.00 (0.96-1.05)    | 0.869   |
| - Female Sex                  | 4.42 (1.27-15.37)   | 0.020   |
| - CAD (CTA or invasively)     | 0.24 (0.06-0.93)    | 0.039   |
| <i>Model 5</i> <b>n = 79</b>  |                     |         |
| - MAD presence                | 9.05 (1.57-52.12)   | 0.014   |
| - Female Sex                  | 2.58 (0.63-10.61)   | 0.189   |
| - CAD (CT or invasively)      | 0.53 (0.12-2.34)    | 0.403   |
| - LGE                         | 0.04 (0.01-0.25)    | <0.001  |

1 **Table 3.** Uni- and multivariable analyses

2

3 *BMI: body mass index, CAD: coronary artery disease, CPR: cardio-pulmonary resuscitation,*

4 *CT: computed tomography, EDVi: indexed end-diastolic volume, EF: ejection fraction, ESVi:*

- 1 *indexed end-systolic volume, hs: high-sensitive, LGE: late gadolinium enhancement, MAD:*
- 2 *mitral annular disjunction, NT-proBNP: N-terminal pro-B-type natriuretic peptide.*

1 **Table 4.** Rhythmological features.

|                                                                  | <b>All patients<br/>(n=86)</b> | <b>definable-cause<br/>(n=52)</b> | <b>unknown-cause<br/>(n=34)</b> | <b>p-value</b> |
|------------------------------------------------------------------|--------------------------------|-----------------------------------|---------------------------------|----------------|
| <b>Initial Rhythm at CPR<br/>(81/86 patients), n(%)</b>          |                                |                                   |                                 | 0.155          |
| - VF                                                             | 67 (78)                        | 37 (71)                           | 30 (88)                         |                |
| - VT                                                             | 5 (6)                          | 3 (6)                             | 2 (6)                           |                |
| - Asystole                                                       | 5 (6)                          | 3 (6)                             | 2 (6)                           |                |
| - PEA                                                            | 4 (5)                          | 4 (8)                             | 0 (0)                           |                |
| <b>Repolarisation at baseline<br/>ECG (79/86 patients), n(%)</b> |                                |                                   |                                 | <b>0.020</b>   |
| - ST-elevation                                                   | 13 (16)                        | 12 (26)                           | 1 (3)                           |                |
| - ST-depression                                                  | 4 (5)                          | 1 (2)                             | 3 (9)                           |                |
| - terminal negative T                                            | 11 (14)                        | 4 (9)                             | 7 (22)                          |                |
| - preterm. negative T                                            | 9 (11)                         | 7 (15)                            | 2 (6)                           |                |
| <b>Events in patient history,<br/>n(%)</b>                       |                                |                                   |                                 | 0.507          |
| - VT                                                             | 2 (2)                          | 2 (4)                             | 0 (0)                           |                |
| - Frequent ES                                                    | 3 (3)                          | 1 (2)                             | 2 (6)                           |                |
| - BBB                                                            | 2 (2)                          | 1 (2)                             | 1 (3)                           |                |

2



|                                            |       |       |       |       |
|--------------------------------------------|-------|-------|-------|-------|
| <b>Events during hospitalisation, n(%)</b> |       |       |       | 0.646 |
| - VF                                       | 5 (6) | 4 (8) | 1 (3) |       |
| - VT                                       | 6 (7) | 3 (6) | 3 (9) |       |
| - Asystole                                 | 1 (1) | 1 (2) | 0 (0) |       |
| - PEA                                      | 0 (0) | 0 (0) | 0 (0) |       |
| - AF                                       | 2 (2) | 1 (2) | 1 (3) |       |

---

|                                     |       |       |       |       |
|-------------------------------------|-------|-------|-------|-------|
| <b>Events after discharge, n(%)</b> |       |       |       | 0.444 |
| - VF                                | 5 (6) | 2 (4) | 3 (9) |       |
| - VT                                | 2 (2) | 1 (2) | 1 (3) |       |
| - AF                                | 1 (1) | 0 (0) | 1 (3) |       |

1 *AF: atrial fibrillation, BBB: bundle branch block, CPR: cardio-pulmonary resuscitation, ES:*

2 *extrasystole, PEA: pulseless electrical activity, VF: ventricular fibrillation, VT: ventricular*

3 *tachycardia.*

4

86 OHCA  
patients

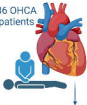

definable-cause  
(n = 52, 60%)

unknown-cause  
(n = 34, 40%)

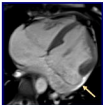

Cardiac MRI

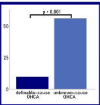

Prevalence of MAD, %

MAD is an independent marker of  
unknown-cause OHCA (odds ratio: 8.49)

97 CA-Patients  
CMR performed

**Excluded:**

No Adequate Long-Axis View (n=10)  
In-Hospital Cardiac Arrest (n=1)

86 OHCA-Patients  
CMR Performed  
Presence and Extent of MAD evaluable

Unknown Cause  
n = 34

Definable Cause  
n = 52

|                         |              |
|-------------------------|--------------|
| Myocardial Infarction   | n = 30 (58%) |
| Myocarditis             | n = 5 (10%)  |
| Cardiomyopathies        | n = 5 (10%)  |
| Pulmonary Embolism      | n = 3 (6%)   |
| Intoxication            | n = 2 (4%)   |
| Aortic Dissection       | n = 1 (2%)   |
| Pericardial Tamponade   | n = 1 (2%)   |
| Long QT-Syndrome        | n = 1 (2%)   |
| Hypoglycemia            | n = 1 (2%)   |
| Thyrotoxic Crisis       | n = 1 (2%)   |
| Congenital Heart Defect | n = 1 (2%)   |
| Respiratory Infection   | n = 1 (2%)   |

MAD  
n = 19 (56%)

No MAD  
n = 15 (44%)

MAD  
n = 5 (10%)

No MAD  
n = 47 (90%)

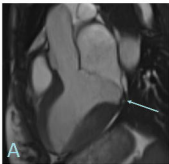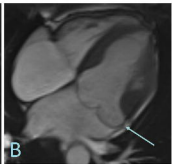

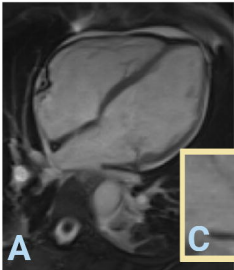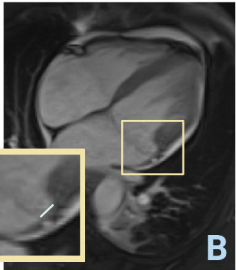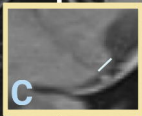

Source: https://medrxiv.org/content/10.1101/2023.06.05.23290557v1.full.pdf
